# Supplementary material for: Functional polymeric hybrid nanotubular materials derived from natural cellulose substances
Source: Royal Society of Chemistry journal article supplement (doi:10.1039/c0jm01234c), 2010-01-01
Supplement: c0jm01234c.pdf [file c0jm01234c.pdf]

## Functional polymeric hybrid nanotubular materials derived from natural cellulose substances

Yuanqing Gu, Tao Niu and Jianguo Huang\*

*Department of Chemistry, Zhejiang University, Hangzhou, Zhejiang 310027, China*

*Email: jghuang@zju.edu.cn*

### Electronic Supplementing Information

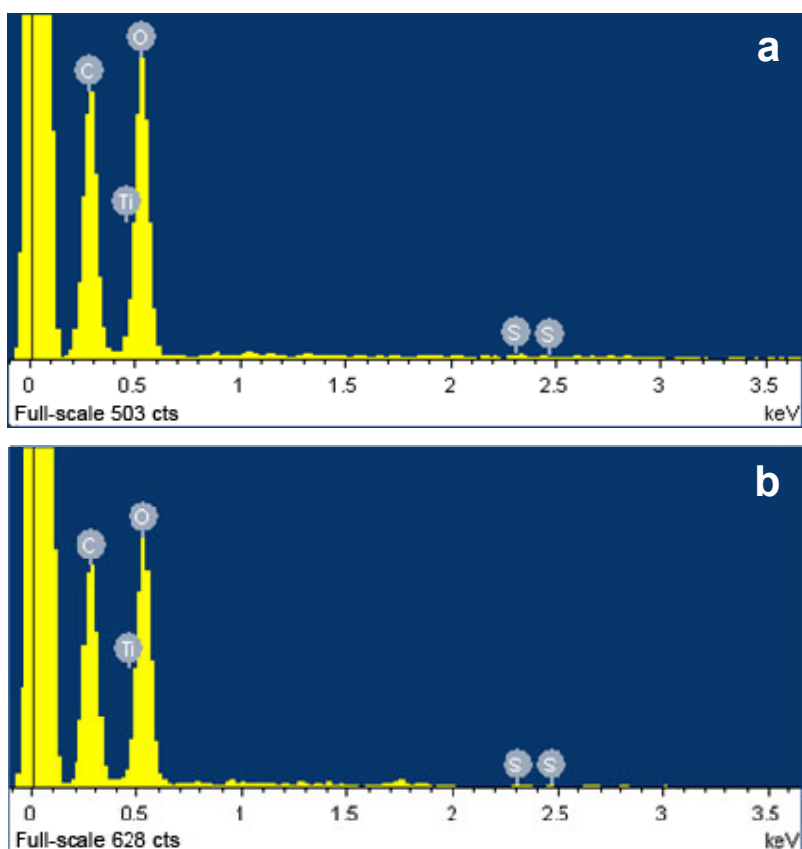

**Fig. S1** EDX microanalysis reports of the resultant (titania/heparin)<sub>10</sub> (a) and titania/(H-PVA)<sub>5</sub> (b) nanotubular hybrid materials; sulfur content of the corresponding sample is 0.65% and 0.12%, respectively. The analyses were carried out without any conductive metal coating of the samples.

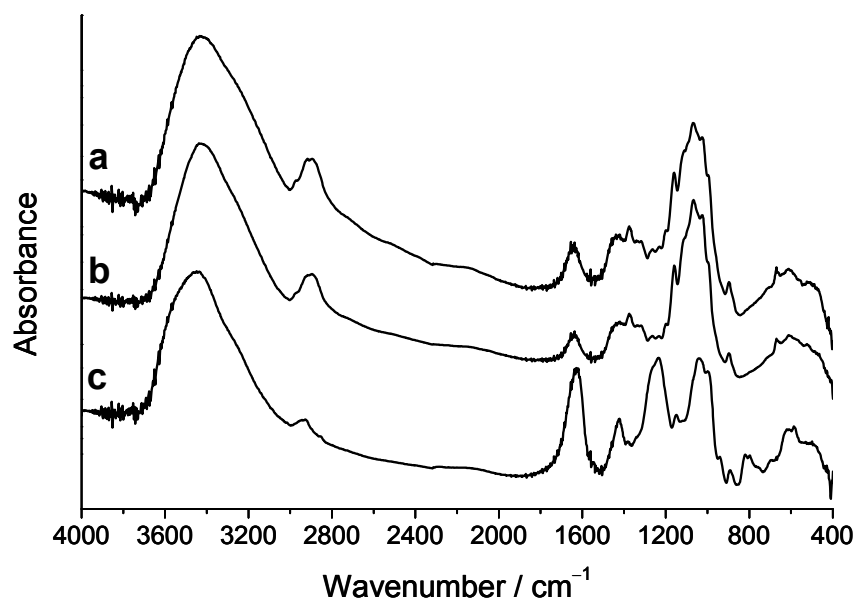

**Fig. S2** FT-IR spectra of (titania/heparin)<sub>10</sub> (a) and (titania/H-PVA)<sub>5</sub> (b) nanotubular hybrid materials, and the raw heparin powder employed for the material fabrication (c).

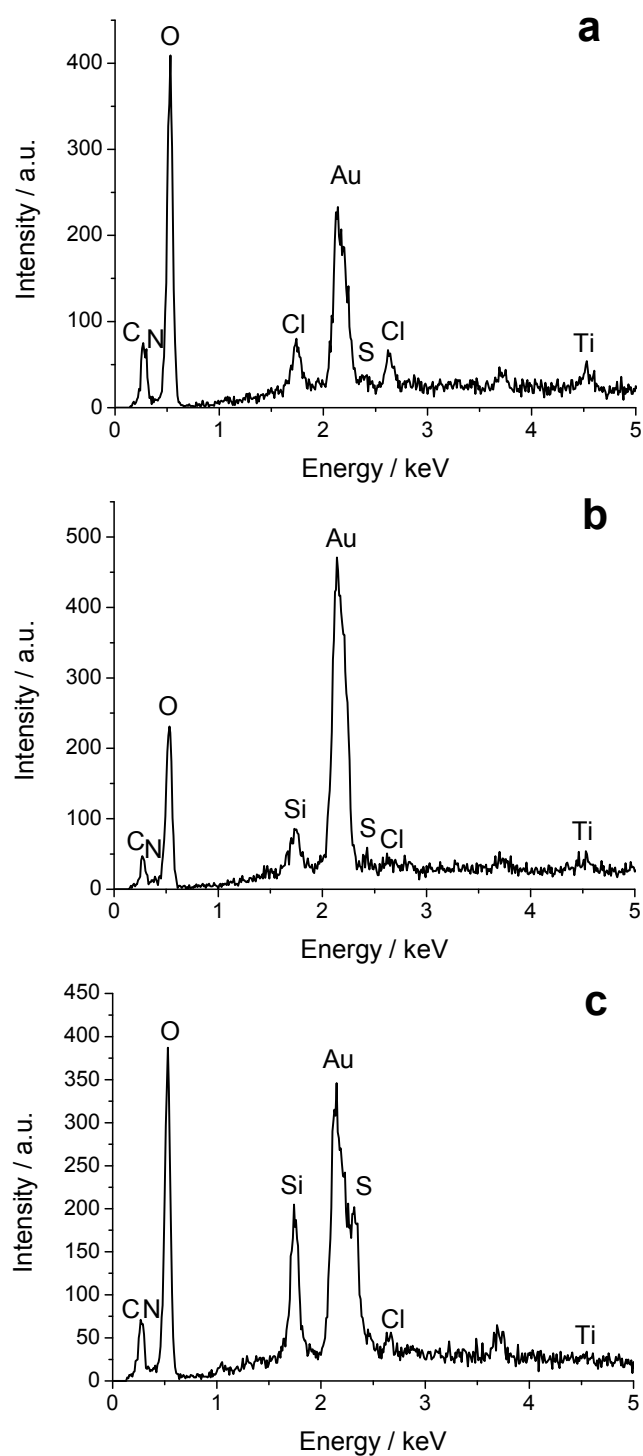

**Fig. S3** Energy dispersive X-ray (EDX) microanalysis report of resultant nanotubular materials of titania/(PEI/PSS)<sub>10</sub> (a), titania/(PAH/PSS)<sub>10</sub> and titania/(PDDA/PSS)<sub>10</sub>, showing titania, carbon, oxygen, nitrogen and sulfur component from the polyelectrolytes. Si peaks come from silicon wafer substrate to support the specimens, and Au peaks come from Au-coating used to increase conductivity to make SEM observations possible.
